# Supplementary material for: Green pepper-derived hierarchical porous carbon for supercapacitors with high performance
Source: Royal Society of Chemistry journal article supplement (doi:10.1039/d3ma00045a), 2023-01-01
Supplement: d3ma00045a1.pdf [file d3ma00045a1.pdf]

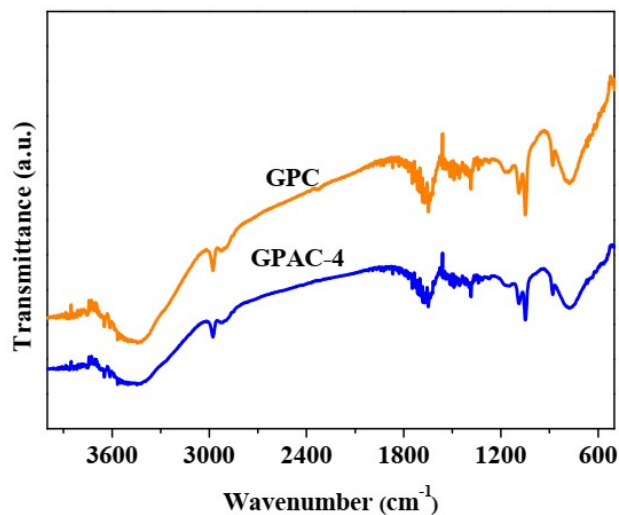

Fig. S1 FT-IR spectra of GPC and GPAC-4

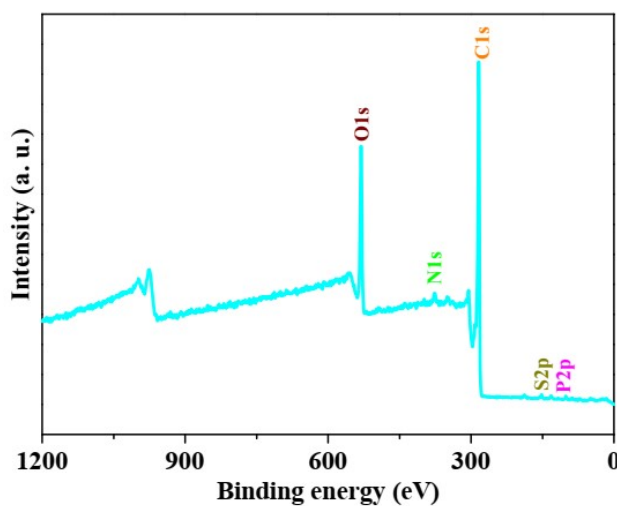

Fig. S2 XPS survey spectrum of GPAC-4

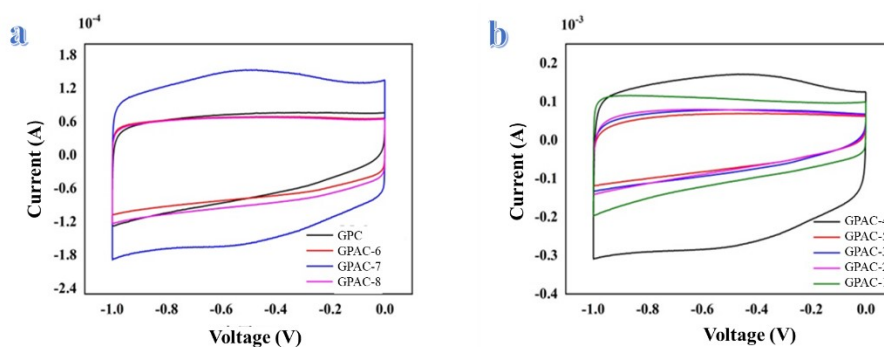

Fig. S3 (a) CV curves of GPC and GPAC samples prepared under different temperature at 100 mV/s. (b) CV curves of GPAC samples prepared under different ratios of precursor/KOH at 100 mV/s
